# Supplementary material
Source: PubMed Central journal article supplement (PMC2991488)

Figure A-1A

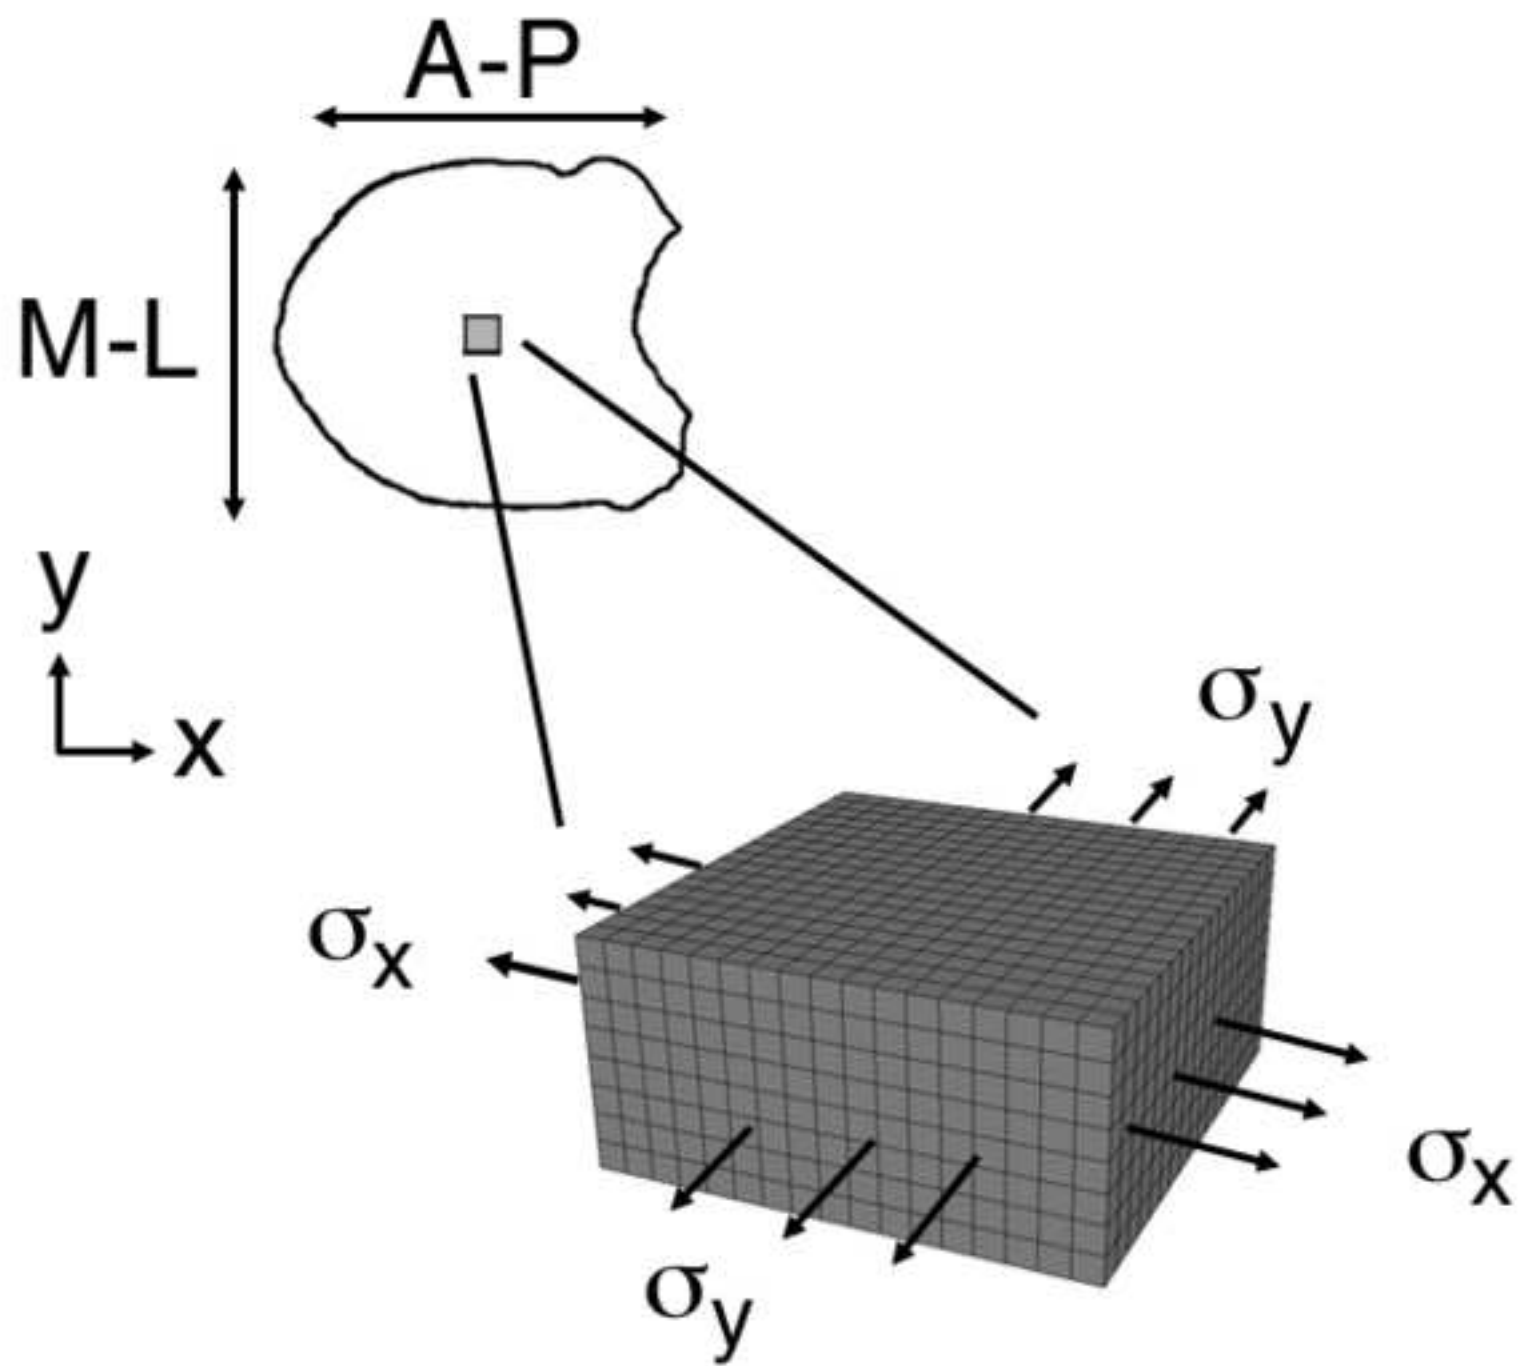

Figure A-1B

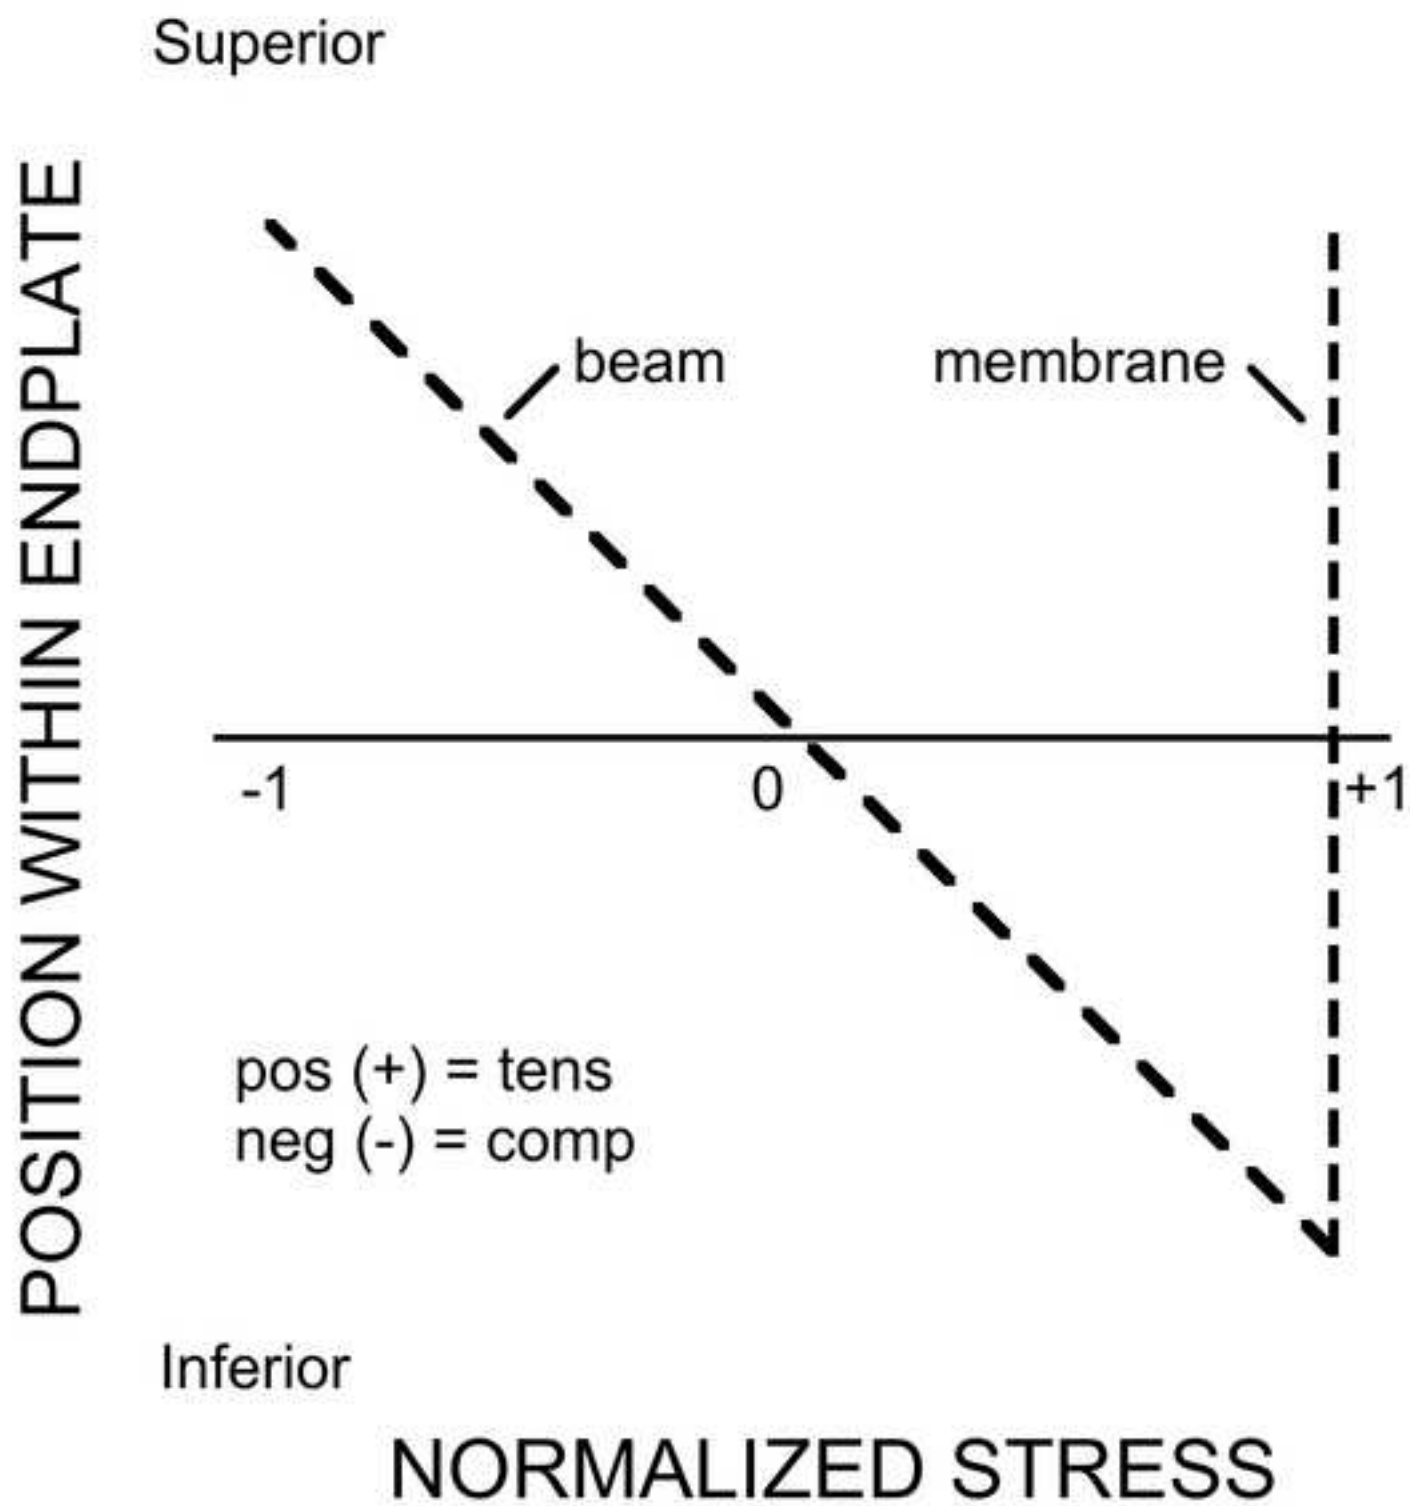

Figure A-1C

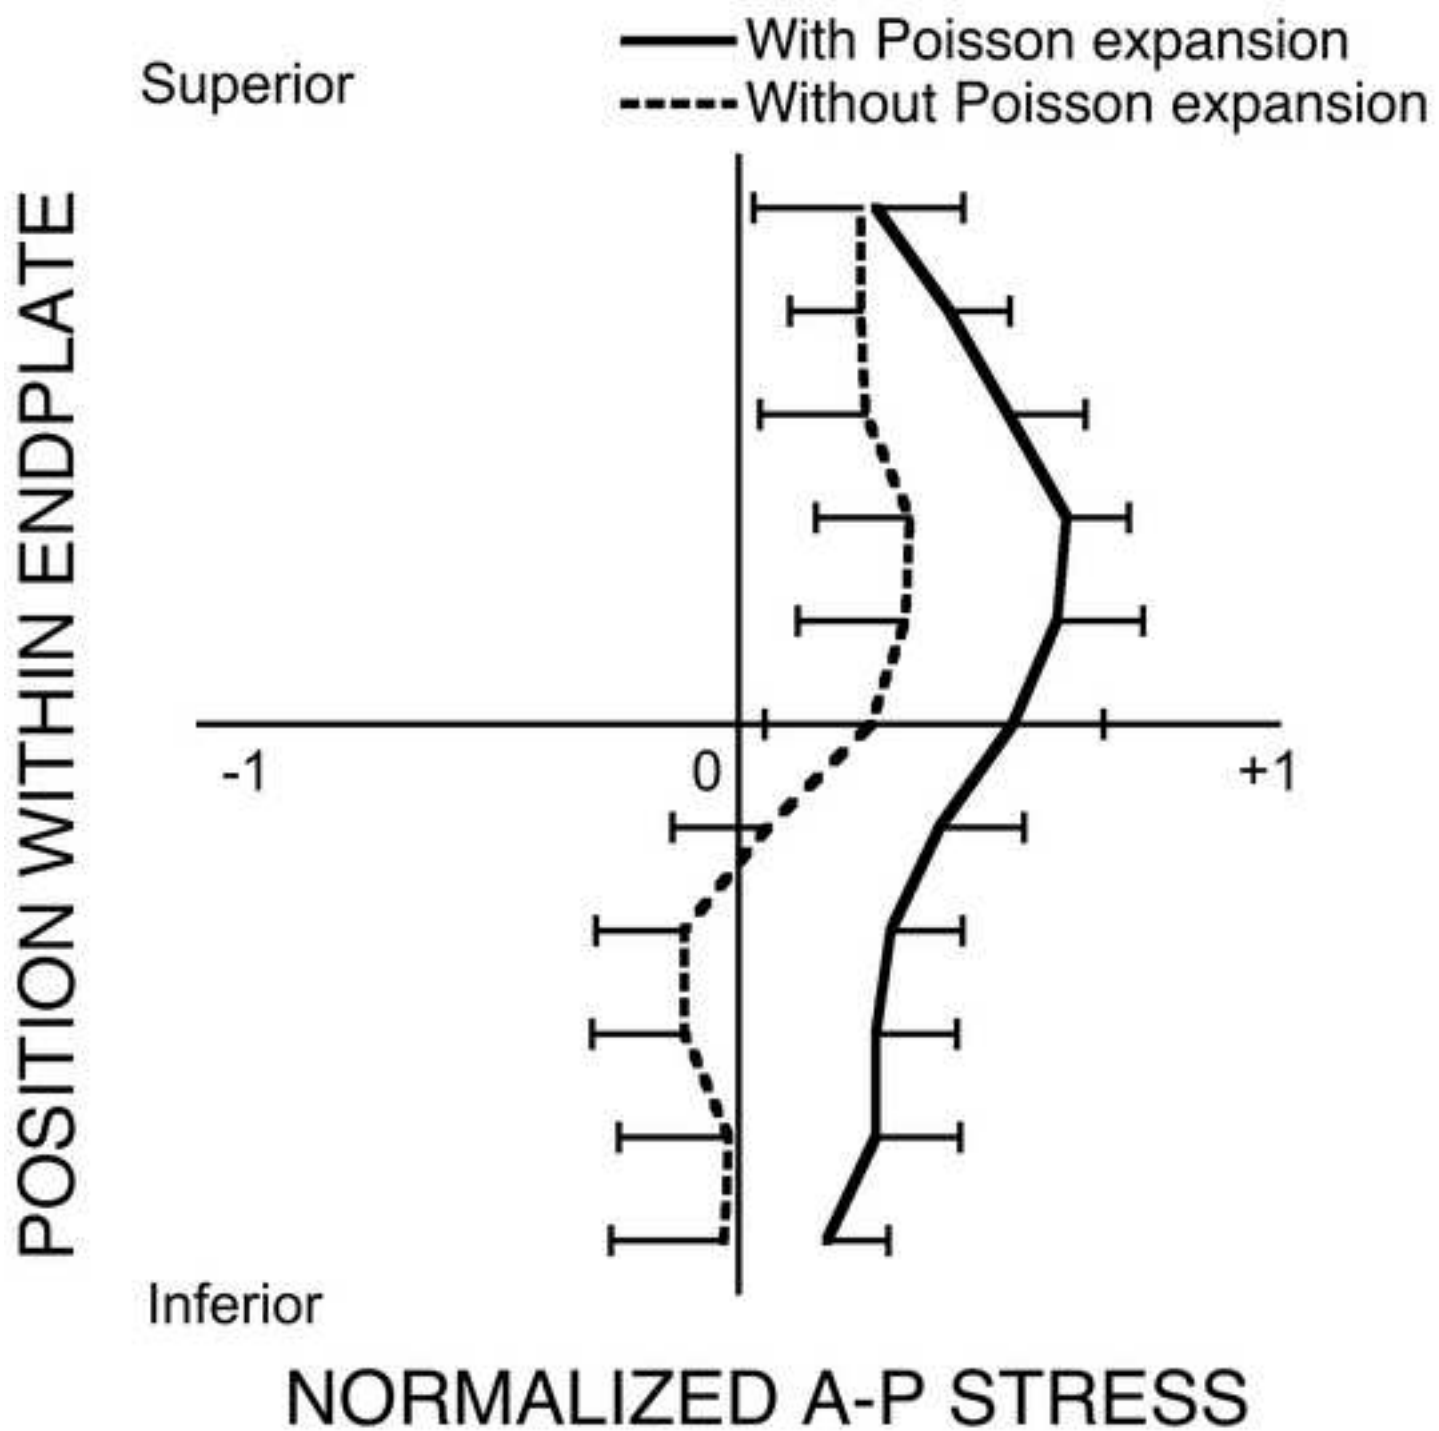

Figure A-1D

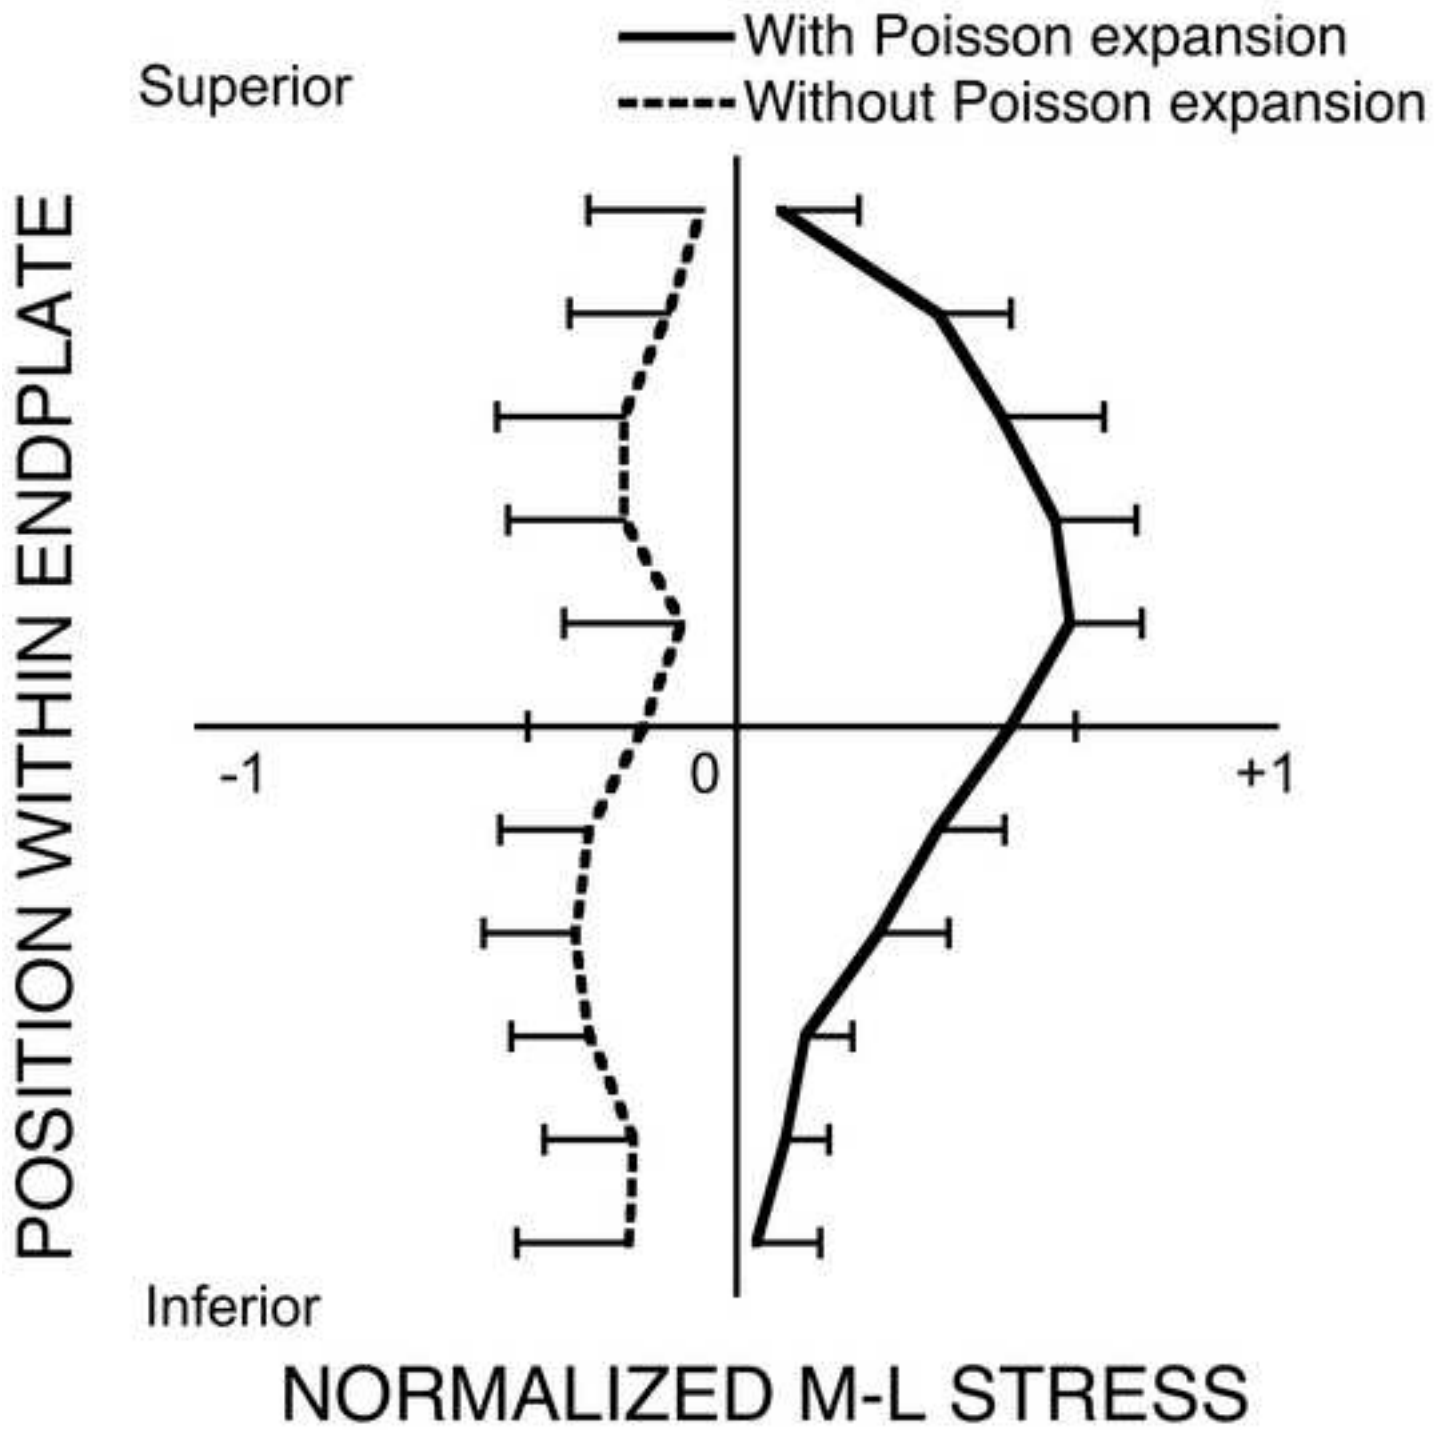

Supplement: NIHMS228394-supplement-02.pdf [file NIHMS228394-supplement-02.pdf]
